# Supplementary material
Source: MDPI journal article supplement (https://www.mdpi.com/2073-4441/12/5/1231)
Supplement: s1 [file s1]

Table S1. Stormwater Management Objective Comparison between Sustainable Development Goals (SDGs), International Water Association (IWA) Principles for Water Wise Cities (WWC), Australia Water Sensitive Cities (WSC), Singapore Active, Beautiful, Clean (ABC) Water and China Sponge City Construction (SCC)

| Objective classification | Specific objective              | SDGs<br>(2030) | IWA<br>Principles<br>for WWC | Australia<br>WSC | Singapore<br>ABC Water<br>program | China SCC |
|--------------------------|---------------------------------|----------------|------------------------------|------------------|-----------------------------------|-----------|
| Stormwater system        | Surface water control           | √              | √                            | √                | √                                 | √         |
|                          | System performance              | √              | √                            | √                | √                                 | √         |
|                          | Economic sustainability         | √              | √                            | √                |                                   |           |
|                          | Technical Innovation            | √              | √                            | √                | √                                 |           |
| Integrated management    | Environmental governance        | √              | √                            | √                | √                                 | √         |
|                          | Disaster resistance             | √              | √                            | √                | √                                 | √         |
|                          | Resource efficiency             | √              | √                            | √                | √                                 | √         |
| Social engagement        | Public participation            | √              | √                            | √                | √                                 |           |
|                          | Scientific governance           | √              | √                            | √                |                                   |           |
| Urban development        | Urban space quality improvement | √              | √                            | √                | √                                 | √         |
|                          | Public infrastructure renewal   | √              | √                            | √                |                                   |           |
|                          | City resilience enhancement     | √              | √                            | √                | √                                 | √         |

Supplementary Table S2. Decision Support Tools Comparison under Comprehensive Evaluation Framework for Sustainable Stormwater Management

| Objective classification | Specific objectives     | Indicators                                                       | SWMM | SUSTAIN | MIKE URBAN | Infoworks | MUSIC | DAnCE4 Water | Urban BEATS | CALVIN |
|--------------------------|-------------------------|------------------------------------------------------------------|------|---------|------------|-----------|-------|--------------|-------------|--------|
| Stormwater system        | Surface runoff control  | Runoff quantity control                                          | √    | √       | √          | √         | √     | √            | √           | √      |
|                          |                         | Non-point source pollution control                               | √    | √       |            | √         | √     | √            | √           |        |
|                          | System performance      | Meet design objectives                                           | √    | √       | √          | √         | √     | √            | √           | √      |
|                          |                         | Operational reliability                                          | √    | √       | √          | √         | √     | √            | √           | √      |
|                          |                         | Space requirement                                                |      |         |            |           |       |              | √           |        |
|                          |                         | Site adaptability                                                |      | √       |            |           |       |              | √           |        |
|                          |                         | System flexibility                                               | √    | √       | √          | √         | √     | √            | √           |        |
|                          |                         | System complexity                                                |      | √       | √          | √         | √     |              |             |        |
|                          |                         | System accessibility and security                                |      |         |            |           |       |              |             |        |
|                          |                         | Suitable system layout/structure                                 |      |         |            |           |       |              |             |        |
|                          |                         | Conformity to technical specifications and standard construction |      |         |            |           | √     |              |             |        |
|                          | Economic sustainability | System maintainability                                           |      |         |            |           |       |              |             |        |
|                          |                         | Self-sufficiency                                                 |      |         |            |           |       | √            | √           |        |
|                          |                         | Capital cost                                                     |      | √       |            |           | √     | √            | √           | √      |
|                          |                         | Operation and maintenance cost                                   |      | √       |            |           | √     | √            | √           | √      |
|                          | Technical innovation    | System operation intelligence                                    |      |         |            |           |       |              |             |        |





|                      |                                       |                                                                           |   |   |
|----------------------|---------------------------------------|---------------------------------------------------------------------------|---|---|
| Urban<br>development | Scientific<br>governance              | Organize and carry<br>out community<br>activities                         |   |   |
|                      |                                       | Information<br>transparency                                               | √ | √ |
|                      |                                       | Water-related<br>business<br>opportunity<br>(industrialization)           |   |   |
|                      |                                       | Assessment of<br>professional<br>capacities.                              |   |   |
|                      |                                       | Inter-disciplinary,<br>inter-agency<br>cooperation                        |   |   |
|                      |                                       | Participation of<br>stakeholders and<br>policy makers.                    | √ | √ |
|                      |                                       | Assessment of<br>leadership<br>capability                                 |   |   |
|                      |                                       | Multi-sectoral<br>benefits                                                |   |   |
|                      | Urban space<br>quality<br>improvement | City livability and<br>landscape<br>improvement                           |   |   |
|                      |                                       | Consider water<br>as a major factor<br>of urban<br>planning and<br>design |   |   |
|                      |                                       | Activate blue-<br>green space                                             |   |   |

|                               |                                                                    |   |  |   |   |  |   |   |
|-------------------------------|--------------------------------------------------------------------|---|--|---|---|--|---|---|
|                               | Increase vegetation coverage.                                      |   |  |   |   |  |   |   |
|                               | Improve city aesthetics                                            |   |  |   |   |  |   |   |
|                               | Increase recreational space                                        |   |  |   |   |  |   |   |
|                               | Increase property values                                           |   |  |   |   |  |   |   |
| Public infrastructure renewal | Construction of multifunctional water-related infrastructure       |   |  |   |   |  |   |   |
|                               | Accessibility and affordability of water-related public facilities |   |  |   |   |  |   |   |
| City resilience enhancement   | Adaptability to extreme weather                                    | √ |  | √ | √ |  | √ | √ |
|                               | Urban heat island effect mitigation                                |   |  |   |   |  | √ |   |

SWMM - Storm Water Management Model, SUSTAIN - System for Urban Stormwater Treatment and Analysis Integration, MUSIC - Model for Urban Stormwater Improvement Conceptualization, DAnCE4Water - Dynamic Adaption for eNabling City Evolution for Water, UrbanBEATS - Urban Biophysical Environments And Technologies Simulator.
